# Supplementary material for: Serum Albumin and Post-Stroke Outcomes: Analysis of UK Regional Registry Data, Systematic Review, and Meta-Analysis
Source: MDPI journal article supplement (doi:10.3390/nu16101486), 2024-05-14
Supplement: s1 [file s1]

## Detailed Methods

### Supplementary Methods S1. Search strategy.

#### Embase

**Albumin** ((exp albumin/) OR (exp hypoalbuminemia/)) **And Stroke** ((exp cerebrovascular accident/) OR (stroke\*.tw.) OR ("cerebral isch?mia".tw.) OR (TIA.tw.) OR ("acute isch?mic infarct".tw.)) **AND Outcomes** ((outcome.tw.) OR (mortality.tw.) OR ("length of stay".tw.) OR ("modified rankin scale".tw.) OR ("mRS.tw.") OR (functional.tw.) OR (exp prognosis/) OR (dependency.tw.))

#### MEDLINE(R)

**Albumin** ((exp Albumins/) OR (exp Serum Albumin/) OR (exp Hypoalbuminemia)) **And Stroke** ((exp Stroke/) OR (exp Ischemic Stroke/) OR (stroke\*.tw.) OR ("cerebral isch\*mia".tw.) OR ("acute isch\*mic infarct".tw.) OR (TIA.tw.) OR ("ischaemic stroke".tw.) OR ("cerebrovascular accident".tw.)) **AND Outcomes** (outcome.tw.) OR (mortality.tw.) OR ("length of stay".tw.) OR ("modified rankin scale".tw.) OR (mRS.tw.) OR (functional.tw.) OR (exp Prognosis/) OR (dependency.tw.)

#### Scopus

**Albumin** TITLE-ABS-KEY (albumin OR "serum albumin" OR hypoalbuminemia ) **And Stroke** TITLE-ABS-KEY (stroke\* OR "ischemic stroke" OR "ischaemic stroke" OR "cerebral ischaemia" OR "cerebral ischemia" OR tia OR "cerebrovascular accident") **AND Outcomes** TITLE-ABS-KEY (outcome OR mortality OR "length of stay" OR "modified rankin scale" OR mrs OR functional OR prognosis OR dependency))

Supplementary Methods S2. Statistical analysis for the meta-analysis.

Whilst the studies presented in the previous meta-analysis by Zhou<sup>1</sup> *et al*, were considered, our analysis was based on the effects size of dose stratified albumin opposed to albumin as a continuous variable and therefore multiple studies were excluded due to heterogeneity. Four<sup>2-5</sup> out of six studies<sup>1-5</sup> were excluded from the long-term mortality analyses. Gariballa<sup>2</sup> *et al*, reported a HR of 0.91(95% CI 0.84 - 0.99) for every +1g/L increment in albumin. The study provided no information on the distribution of albumin across quartiles and therefore these results could not be converted for HR comparing albumin quartiles to be included in the meta-analysis. Similarly, Carter Am *et al*<sup>3</sup> reported a HR of 0.65 (95% CI 0.4 - 0.96) for albumin levels >43g/L vs 38g/L. This study required extraction of effect estimates from a Kaplan Maier curve to determine effect sizes of albumin as a categorical variable which was determined to not meet the required level of rigor for our analysis. Idicula<sup>4</sup> TT *et al* reports an OR of 0.88 (95% CI 0.83 - 0.93) per +1g/L and Lazaro<sup>5</sup> *et al* reports an OR of 2.00 (95% CI 1.12 - 2.3) per -1g/L. As both studies reported odds ratios instead of hazard ratios, these could not be included in a meta-analysis of studies reporting HR<sup>6</sup>.

For functional outcomes Yang *et al*.<sup>7</sup> was excluded from this outcome. This was due to the population only including patients treated with IVT. In comparison to a reference group of <39.3g/L, albumin groups 39.3g/L - 42.0g/L, 42.1g/L - 43.5g/L, >43.5g/L showed no association with functional outcomes. Four studies, including our own were included in the assessment of poor functional outcome. Dziedzic<sup>8</sup> *et al* and Babu<sup>9</sup> *et al* had to be converted from a continuous scale (g/L and g/dL) into categorical variables. The OR per 1g/L serum albumin increases was converted to per 1g/L serum albumin decrease by taking the inverse. Due to the assumption of linearity of the reported results, it was possible to calculate an

estimated OR for the desired quartiles. The third quartile group (40-44.9g/L) was used as the reference group, based on the medium albumin value of our population and previous studies.

Table S1. International Classification of Disease-tenth edition (ICD-10) codes.

|                                                |                                                                            |
|------------------------------------------------|----------------------------------------------------------------------------|
| Pulmonary disease                              | J40-J47, J60-J67                                                           |
| Atrial fibrillation                            | I48                                                                        |
| Previous cerebrovascular disease               | I60-I66, I670-I672, I674-I679, G450-G452, G454, G458-G46                   |
| Coronary heart disease                         | I20-I25                                                                    |
| Congestive heart failure                       | I50                                                                        |
| Chronic kidney disease                         | N18                                                                        |
| Dementia                                       | F00-F05                                                                    |
| Diabetes mellitus                              | E10-E14                                                                    |
| Hyperlipidaemia                                | E78                                                                        |
| Hypertension                                   | I10-I15                                                                    |
| Liver disease                                  | K70-K77                                                                    |
| Malignancy                                     | C00-C97                                                                    |
| Peptic ulcer disease                           | K25-K28                                                                    |
| Peripheral vascular disease                    | I71, I790, R02, Z958, Z959                                                 |
| Rheumatoid arthritis/connective tissue disease | M32, M34, M332, M053, M058, M059, M060, M063, M069, M050, M052, M051, M353 |

Supplementary Tables S2a – S2g: Missing data analysis tables for imputed variables

Table S2a: Missing data analysis for Pre-stroke modified Rankin Scale.

| Pre-stroke modified Rankin Scale       | Total             | Non-missing       | Missing            | P value |
|----------------------------------------|-------------------|-------------------|--------------------|---------|
| N                                      | 9979              | 9445              | 534                |         |
| Age, years, mean (SD)                  | 78.26 (11.23)     | 78.11 (11.25)     | 80.88 (10.49)      | <0.001  |
| Women                                  | 5219 (52.30)      | 4926 (52.15)      | 293 (54.87)        | 0.222   |
| <b>Comorbidities</b>                   |                   |                   |                    |         |
| Hypertension                           | 6138 (61.51)      | 5866 (62.11)      | 272 (50.94)        | <0.001  |
| Diabetes                               | 1806 (18.10)      | 1712 (18.13)      | 94 (17.60)         | 0.760   |
| Hyperlipidemia                         | 1370 (13.73)      | 1332 (14.10)      | 38 (7.12)          | <0.001  |
| Chronic Heart Disease                  | 2792 (27.98)      | 2647 (28.03)      | 145 (27.15)        | 0.662   |
| Atrial Fibrillation and Atrial Flutter | 3264 (32.71)      | 3089 (32.71)      | 175 (32.77)        | 0.975   |
| Peripheral Vascular Disease            | 659 (6.60)        | 619 (6.55)        | 40 (7.49)          | 0.396   |
| Peptic Ulcer Disease                   | 437 (4.38)        | 403 (4.27)        | 34 (6.37)          | 0.021   |
| Connective Tissue Disease              | 525 (5.26)        | 501 (5.30)        | 24 (4.49)          | 0.415   |
| Cerebral Vascular Disease              | 9867 (98.88)      | 9347 (98.96)      | 520 (97.38)        | <0.001  |
| Dementia                               | 147 (1.47)        | 139 (1.47)        | 8 (1.50)           | 0.961   |
| Cancer                                 | 1590 (15.93)      | 1486 (15.73)      | 104 (19.48)        | 0.022   |
| Renal Diseases                         | 764 (7.66)        | 715 (7.57)        | 49 (9.18)          | 0.175   |
| Liver Disease                          | 151 (1.51)        | 143 (1.51)        | 8 (1.50)           | 0.977   |
| Chronic Pulmonary Disease              | 1464 (14.67)      | 1377 (14.58)      | 87 (16.29)         | 0.276   |
| COPD                                   | 826 (8.28)        | 774 (8.19)        | 52 (9.74)          | 0.208   |
| Pneumonia (Aspiration)                 | 845 (8.47)        | 784 (8.30)        | 61 (11.42)         | 0.012   |
| Pneumonia (Non-Aspiration)             | 1112 (11.14)      | 1027 (10.87)      | 85 (15.92)         | <0.001  |
| <b>Mediation</b>                       |                   |                   |                    |         |
| Antiplatelet agents on discharge       | 5894 (59.06)      | 5759 (60.97)      | 135 (25.28)        | <0.001  |
| Anticoagulants on discharge            | 1200 (12.03)      | 1179 (12.48)      | 21 (3.93)          | <0.001  |
| Antiplatelet agents on admission       | 3657 (36.65)      | 3526 (37.33)      | 131 (24.53)        | <0.001  |
| Anticoagulant agents on admission      | 120 (1.20)        | 120 (1.27)        | 0 (0.00)           | 0.009   |
| <b>Outcomes</b>                        |                   |                   |                    |         |
| Died                                   | 4645 (46.55)      | 4257 (45.07)      | 388 (72.66)        | <0.001  |
| Length of stay                         | 8.00 (4.00-17.29) | 8.00 (4.00-17.00) | 13.00 (5.00-26.00) | <0.001  |

Table S2b: Missing data analysis for Rankin Discharge.

| Rankin Discharge       | Total         | Non-missing   | Missing       | P value |
|------------------------|---------------|---------------|---------------|---------|
| N                      | 9979          | 6967          | 3012          |         |
| Age, years, mean, (SD) | 78.26 (11.23) | 78.66 (11.40) | 77.34 (10.78) | <0.001  |
| Females                | 5219 (52.30)  | 3624 (52.02)  | 1595 (52.95)  | 0.389   |

| Comorbidities                          |                   |                   |                    |        |
|----------------------------------------|-------------------|-------------------|--------------------|--------|
| Hypertension                           | 6138 (61.51)      | 4486 (64.39)      | 1652 (54.85)       | <0.001 |
| Diabetes                               | 1806 (18.10)      | 1359 (19.51)      | 447 (14.84)        | <0.001 |
| Hyperlipidemia                         | 1370 (13.73)      | 1119 (16.06)      | 251 (8.33)         | <0.001 |
| Chronic Heart Disease                  | 2792 (27.98)      | 2048 (29.40)      | 744 (24.70)        | <0.001 |
| Atrial Fibrillation and Atrial Flutter | 3264 (32.71)      | 2425 (34.81)      | 839 (27.86)        | <0.001 |
| Peripheral Vascular Disease            | 659 (6.60)        | 486 (6.98)        | 173 (5.74)         | 0.023  |
| Peptic Ulcer Disease                   | 437 (4.38)        | 299 (4.29)        | 138 (4.58)         | 0.516  |
| Connective Tissue Disease              | 525 (5.26)        | 407 (5.84)        | 118 (3.92)         | <0.001 |
| Cerebral Vascular Disease              | 9867 (98.88)      | 6897 (99.00)      | 2970 (98.61)       | 0.090  |
| Dementia                               | 147 (1.47)        | 127 (1.82)        | 20 (0.66)          | <0.001 |
| Cancer                                 | 1590 (15.93)      | 1188 (17.05)      | 402 (13.35)        | <0.001 |
| Renal Diseases                         | 764 (7.66)        | 612 (8.78)        | 152 (5.05)         | <0.001 |
| Liver Disease                          | 151 (1.51)        | 122 (1.75)        | 29 (0.96)          | 0.003  |
| Chronic Pulmonary Disease              | 1464 (14.67)      | 1121 (16.09)      | 343 (11.39)        | <0.001 |
| COPD                                   | 826 (8.28)        | 644 (9.24)        | 182 (6.04)         | <0.001 |
| Pneumonia (Aspiration)                 | 845 (8.47)        | 746 (10.71)       | 99 (3.29)          | <0.001 |
| Pneumonia (Non-Aspiration)             | 1112 (11.14)      | 941 (13.51)       | 171 (5.68)         | <0.001 |
| Treatment                              |                   |                   |                    |        |
| Antiplatelet agents on discharge       | 5894 (59.06)      | 3935 (56.48)      | 1959 (65.04)       | <0.001 |
| Anticoagulants on discharge            | 1200 (12.03)      | 856 (12.29)       | 344 (11.42)        | 0.222  |
| Antiplatelet agents on admission       | 3657 (36.65)      | 2493 (35.78)      | 1164 (38.65)       | 0.006  |
| Anticoagulant agents on admission      | 120 (1.20)        | 120 (1.72)        | 0 (0.00)           | <0.001 |
| Outcomes                               |                   |                   |                    |        |
| Died                                   | 4645 (46.55)      | 2856 (40.99)      | 1789 (59.40)       | <0.001 |
| Length of stay                         | 8.00 (4.00-17.29) | 6.00 (3.00-15.00) | 12.00 (6.00-23.00) | <0.001 |

Table S2c: Missing data analysis for NIHSS.

| NIHSS                                  | Total         | Non-missing   | Missing       | P value |
|----------------------------------------|---------------|---------------|---------------|---------|
| N                                      | 9979          | 1039          | 8940          |         |
| Age, years, mean (SD)                  | 78.26 (11.23) | 77.08 (12.01) | 78.40 (11.13) | <0.001  |
| Women                                  | 5219 (52.30)  | 506 (48.70)   | 4713 (52.72)  | 0.014   |
| Comorbidities                          |               |               |               |         |
| Hypertension                           | 6138 (61.51)  | 678 (65.26)   | 5460 (61.07)  | 0.009   |
| Diabetes                               | 1806 (18.10)  | 201 (19.35)   | 1605 (17.95)  | 0.270   |
| Hyperlipidemia                         | 1370 (13.73)  | 206 (19.83)   | 1164 (13.02)  | <0.001  |
| Chronic Heart Disease                  | 2792 (27.98)  | 271 (26.08)   | 2521 (28.20)  | 0.150   |
| Atrial Fibrillation and Atrial Flutter | 3264 (32.71)  | 312 (30.03)   | 2952 (33.02)  | 0.052   |

|                                   |                   |                   |                   |        |
|-----------------------------------|-------------------|-------------------|-------------------|--------|
| Peripheral Vascular Disease       | 659 (6.60)        | 74 (7.12)         | 585 (6.54)        | 0.477  |
| Peptic Ulcer Disease              | 437 (4.38)        | 54 (5.20)         | 383 (4.28)        | 0.173  |
| Connective Tissue Disease         | 525 (5.26)        | 65 (6.26)         | 460 (5.15)        | 0.129  |
| Cerebral Vascular Disease         | 9867 (98.88)      | 1038 (99.90)      | 8829 (98.76)      | <0.001 |
| Dementia                          | 147 (1.47)        | 19 (1.83)         | 128 (1.43)        | 0.315  |
| Cancer                            | 1590 (15.93)      | 194 (18.67)       | 1396 (15.62)      | 0.011  |
| Renal Diseases                    | 764 (7.66)        | 108 (10.39)       | 656 (7.34)        | <0.001 |
| Liver Disease                     | 151 (1.51)        | 19 (1.83)         | 132 (1.48)        | 0.379  |
| Chronic Pulmonary Disease         | 1464 (14.67)      | 200 (19.25)       | 1264 (14.14)      | <0.001 |
| COPD                              | 826 (8.28)        | 110 (10.59)       | 716 (8.01)        | 0.004  |
| Pneumonia (Aspiration)            | 845 (8.47)        | 44 (4.23)         | 801 (8.96)        | <0.001 |
| Pneumonia (Non-Aspiration)        | 1112 (11.14)      | 129 (12.42)       | 983 (11.00)       | 0.168  |
| Medication                        |                   |                   |                   |        |
| Antiplatelet agents on discharge  | 5894 (59.06)      | 746 (71.80)       | 5148 (57.58)      | <0.001 |
| Anticoagulants on discharge       | 1200 (12.03)      | 210 (20.21)       | 990 (11.07)       | <0.001 |
| Antiplatelet agents on admission  | 3657 (36.65)      | 104 (10.01)       | 3553 (39.74)      | <0.001 |
| Anticoagulant agents on admission | 120 (1.20)        | 103 (9.91)        | 17 (0.19)         | <0.001 |
| Outcome                           |                   |                   |                   |        |
| Died                              | 4645 (46.55)      | 190 (18.29)       | 4455 (49.83)      | <0.001 |
| Length of stay                    | 8.00 (4.00-17.29) | 4.81 (2.22-12.76) | 9.00 (4.00-18.00) | <0.001 |

Table S2d: Missing data analysis for OCSP classification.

| Bamford                                | Total         | Non-missing   | Missing       | P value |
|----------------------------------------|---------------|---------------|---------------|---------|
| n                                      | 9979          | 9005          | 974           |         |
| Age, years, mean, (SD)                 | 78.26 (11.23) | 78.23 (11.21) | 78.50 (11.44) | 0.477   |
| Women                                  | 5219 (52.30)  | 4727 (52.49)  | 492 (50.51)   | 0.240   |
| Comorbidities                          |               |               |               |         |
| Hypertension                           | 6138 (61.51)  | 5558 (61.72)  | 580 (59.55)   | 0.185   |
| Diabetes                               | 1806 (18.10)  | 1630 (18.10)  | 176 (18.07)   | 0.981   |
| Hyperlipidemia                         | 1370 (13.73)  | 1236 (13.73)  | 134 (13.76)   | 0.978   |
| Chronic Heart Disease                  | 2792 (27.98)  | 2532 (28.12)  | 260 (26.69)   | 0.347   |
| Atrial Fibrillation and Atrial Flutter | 3264 (32.71)  | 2933 (32.57)  | 331 (33.98)   | 0.372   |
| Peripheral Vascular Disease            | 659 (6.60)    | 603 (6.70)    | 56 (5.75)     | 0.258   |
| Peptic Ulcer Disease                   | 437 (4.38)    | 390 (4.33)    | 47 (4.83)     | 0.474   |
| Connective Tissue Disease              | 525 (5.26)    | 481 (5.34)    | 44 (4.52)     | 0.274   |
| Cerebral Vascular Disease              | 9867 (98.88)  | 8905 (98.89)  | 962 (98.77)   | 0.732   |
| Dementia                               | 147 (1.47)    | 129 (1.43)    | 18 (1.85)     | 0.307   |
| Cancer                                 | 1590 (15.93)  | 1404 (15.59)  | 186 (19.10)   | 0.005   |
| Renal Diseases                         | 764 (7.66)    | 666 (7.40)    | 98 (10.06)    | 0.003   |
| Liver Disease                          | 151 (1.51)    | 128 (1.42)    | 23 (2.36)     | 0.022   |

|                                   |                   |                   |                   |        |
|-----------------------------------|-------------------|-------------------|-------------------|--------|
| Chronic Pulmonary Disease         | 1464 (14.67)      | 1316 (14.61)      | 148 (15.20)       | 0.626  |
| COPD                              | 826 (8.28)        | 738 (8.20)        | 88 (9.03)         | 0.366  |
| Pneumonia (Aspiration)            | 845 (8.47)        | 740 (8.22)        | 105 (10.78)       | 0.006  |
| Pneumonia (Non-Aspiration)        | 1112 (11.14)      | 980 (10.88)       | 132 (13.55)       | 0.012  |
| Treatment                         |                   |                   |                   |        |
| Antiplatelet agents on discharge  | 5894 (59.06)      | 5418 (60.17)      | 476 (48.87)       | <0.001 |
| Anticoagulants on discharge       | 1200 (12.03)      | 1104 (12.26)      | 96 (9.86)         | 0.028  |
| Antiplatelet agents on admission  | 3657 (36.65)      | 3298 (36.62)      | 359 (36.86)       | 0.885  |
| Anticoagulant agents on admission | 120 (1.20)        | 114 (1.27)        | 6 (0.62)          | 0.077  |
| Outcomes                          |                   |                   |                   |        |
| Died                              | 4645 (46.55)      | 4220 (46.86)      | 425 (43.63)       | 0.055  |
| Length of Stay                    | 8.00 (4.00-17.29) | 8.00 (4.00-18.00) | 6.02 (3.00-16.00) | <0.001 |

Table S2e: Missing data analysis for Albumin at admission.

| Albumin                                | Total         | Non-missing   | Missing       | P value |
|----------------------------------------|---------------|---------------|---------------|---------|
| n                                      | 9979          | 9592          | 387           |         |
| Age, years, mean, (SD)                 | 78.26 (11.23) | 78.30 (11.22) | 77.15 (11.43) | 0.048   |
| Females                                | 5219 (52.30)  | 5038 (52.52)  | 181 (46.77)   | 0.026   |
| Comorbidities                          |               |               |               |         |
| Hypertension                           | 6138 (61.51)  | 5920 (61.72)  | 218 (56.33)   | 0.033   |
| Diabetes                               | 1806 (18.10)  | 1734 (18.08)  | 72 (18.60)    | 0.792   |
| Hyperlipidemia                         | 1370 (13.73)  | 1316 (13.72)  | 54 (13.95)    | 0.896   |
| Chronic Heart Disease                  | 2792 (27.98)  | 2711 (28.26)  | 81 (20.93)    | 0.002   |
| Atrial Fibrillation and Atrial Flutter | 3264 (32.71)  | 3172 (33.07)  | 92 (23.77)    | <0.001  |
| Peripheral Vascular Disease            | 659 (6.60)    | 636 (6.63)    | 23 (5.94)     | 0.593   |
| Peptic Ulcer Disease                   | 437 (4.38)    | 422 (4.40)    | 15 (3.88)     | 0.622   |
| Connective Tissue Disease              | 525 (5.26)    | 513 (5.35)    | 12 (3.10)     | 0.052   |
| Cerebral Vascular Disease              | 9867 (98.88)  | 9501 (99.05)  | 366 (94.57)   | <0.001  |
| Dementia                               | 147 (1.47)    | 142 (1.48)    | 5 (1.29)      | 0.763   |
| Cancer                                 | 1590 (15.93)  | 1530 (15.95)  | 60 (15.50)    | 0.814   |
| Renal Diseases                         | 764 (7.66)    | 741 (7.73)    | 23 (5.94)     | 0.196   |
| Liver Disease                          | 151 (1.51)    | 148 (1.54)    | 3 (0.78)      | 0.225   |
| Chronic Pulmonary Disease              | 1464 (14.67)  | 1407 (14.67)  | 57 (14.73)    | 0.974   |
| COPD                                   | 826 (8.28)    | 798 (8.32)    | 28 (7.24)     | 0.448   |
| Pneumonia (Aspiration)                 | 845 (8.47)    | 825 (8.60)    | 20 (5.17)     | 0.017   |
| Pneumonia (Non-Aspiration)             | 1112 (11.14)  | 1082 (11.28)  | 30 (7.75)     | 0.031   |
| Treatment                              |               |               |               |         |
| Antiplatelet agents on discharge       | 5894 (59.06)  | 5706 (59.49)  | 188 (48.58)   | <0.001  |



|                                   |                   |                   |                   |        |
|-----------------------------------|-------------------|-------------------|-------------------|--------|
| Anticoagulants on discharge       | 1200 (12.03)      | 1174 (12.24)      | 26 (6.72)         | 0.001  |
| Antiplatelet agents on admission  | 3657 (36.65)      | 3530 (36.80)      | 127 (32.82)       | 0.111  |
| Anticoagulant agents on admission | 120 (1.20)        | 118 (1.23)        | 2 (0.52)          | 0.207  |
| <b>Outcomes</b>                   |                   |                   |                   |        |
| Died                              | 4645 (46.55)      | 4491 (46.82)      | 154 (39.79)       | 0.007  |
| Length of stay                    | 8.00 (4.00-17.29) | 8.00 (4.00-18.00) | 5.00 (2.00-11.00) | <0.001 |

Table S2f: Missing data analysis for WBC at admission.

| WBC                                    | Total         | Non-missing   | Missing       | P value |
|----------------------------------------|---------------|---------------|---------------|---------|
| n                                      | 9979          | 9773          | 206           |         |
| Age, years, mean, (SD)                 | 78.26 (11.23) | 78.26 (11.23) | 77.96 (11.05) | 0.703   |
| Females                                | 5219 (52.30)  | 5120 (52.39)  | 99 (48.06)    | 0.218   |
| <b>Comorbidities</b>                   |               |               |               |         |
| Hypertension                           | 6138 (61.51)  | 6027 (61.67)  | 111 (53.88)   | 0.023   |
| Diabetes                               | 1806 (18.10)  | 1760 (18.01)  | 46 (22.33)    | 0.111   |
| Hyperlipidemia                         | 1370 (13.73)  | 1339 (13.70)  | 31 (15.05)    | 0.578   |
| Chronic Heart Disease                  | 2792 (27.98)  | 2757 (28.21)  | 35 (16.99)    | <0.001  |
| Atrial Fibrillation and Atrial Flutter | 3264 (32.71)  | 3210 (32.85)  | 54 (26.21)    | 0.045   |
| Peripheral Vascular Disease            | 659 (6.60)    | 648 (6.63)    | 11 (5.34)     | 0.460   |
| Peptic Ulcer Disease                   | 437 (4.38)    | 430 (4.40)    | 7 (3.40)      | 0.487   |
| Connective Tissue Disease              | 525 (5.26)    | 520 (5.32)    | 5 (2.43)      | 0.066   |
| Cerebral Vascular Disease              | 9867 (98.88)  | 9680 (99.05)  | 187 (90.78)   | <0.001  |
| Dementia                               | 147 (1.47)    | 143 (1.46)    | 4 (1.94)      | 0.573   |
| Cancer                                 | 1590 (15.93)  | 1555 (15.91)  | 35 (16.99)    | 0.675   |
| Renal Diseases                         | 764 (7.66)    | 754 (7.72)    | 10 (4.85)     | 0.126   |
| Liver Disease                          | 151 (1.51)    | 149 (1.52)    | 2 (0.97)      | 0.519   |
| Chronic Pulmonary Disease              | 1464 (14.67)  | 1437 (14.70)  | 27 (13.11)    | 0.521   |
| COPD                                   | 826 (8.28)    | 815 (8.34)    | 11 (5.34)     | 0.122   |
| Pneumonia (Aspiration)                 | 845 (8.47)    | 835 (8.54)    | 10 (4.85)     | 0.060   |
| Pneumonia (Non-Aspiration)             | 1112 (11.14)  | 1092 (11.17)  | 20 (9.71)     | 0.508   |
| <b>Treatment</b>                       |               |               |               |         |
| Antiplatelet agents on discharge       | 5894 (59.06)  | 5808 (59.43)  | 86 (41.75)    | <0.001  |
| Anticoagulants on discharge            | 1200 (12.03)  | 1189 (12.17)  | 11 (5.34)     | 0.003   |
| Antiplatelet agents on admission       | 3657 (36.65)  | 3595 (36.79)  | 62 (30.10)    | 0.049   |
| Anticoagulant agents on admission      | 120 (1.20)    | 119 (1.22)    | 1 (0.49)      | 0.340   |
| <b>Outcomes</b>                        |               |               |               |         |
| Died                                   | 4645 (46.55)  | 4572 (46.78)  | 73 (35.44)    | 0.001   |

|                |                   |                   |                   |        |
|----------------|-------------------|-------------------|-------------------|--------|
| Length of stay | 8.00 (4.00-17.29) | 8.00 (4.00-18.00) | 5.00 (2.00-12.00) | <0.001 |
|----------------|-------------------|-------------------|-------------------|--------|

Table S2g: Missing data analysis for CRP at admission.

| CRP                                    | Total             | Non-missing       | Missing          | P value |
|----------------------------------------|-------------------|-------------------|------------------|---------|
| n                                      | 9979              | 8298              | 1681             |         |
| Age, years, mean, (SD)                 | 78.26 (11.23)     | 78.87 (10.96)     | 75.22 (12.03)    | <0.001  |
| Females                                | 5219 (52.30)      | 4392 (52.93)      | 827 (49.20)      | 0.005   |
| <b>Comorbidities</b>                   |                   |                   |                  |         |
| Hypertension                           | 6138 (61.51)      | 5207 (62.75)      | 931 (55.38)      | <0.001  |
| Diabetes                               | 1806 (18.10)      | 1558 (18.78)      | 248 (14.75)      | <0.001  |
| Hyperlipidemia                         | 1370 (13.73)      | 1123 (13.53)      | 247 (14.69)      | 0.208   |
| Chronic Heart Disease                  | 2792 (27.98)      | 2418 (29.14)      | 374 (22.25)      | <0.001  |
| Atrial Fibrillation and Atrial Flutter | 3264 (32.71)      | 2908 (35.04)      | 356 (21.18)      | <0.001  |
| Peripheral Vascular Disease            | 659 (6.60)        | 593 (7.15)        | 66 (3.93)        | <0.001  |
| Peptic Ulcer Disease                   | 437 (4.38)        | 394 (4.75)        | 43 (2.56)        | <0.001  |
| Connective Tissue Disease              | 525 (5.26)        | 476 (5.74)        | 49 (2.91)        | <0.001  |
| Cerebral Vascular Disease              | 9867 (98.88)      | 8220 (99.06)      | 1647 (97.98)     | <0.001  |
| Dementia                               | 147 (1.47)        | 132 (1.59)        | 15 (0.89)        | 0.030   |
| Cancer                                 | 1590 (15.93)      | 1374 (16.56)      | 216 (12.85)      | <0.001  |
| Renal Diseases                         | 764 (7.66)        | 702 (8.46)        | 62 (3.69)        | <0.001  |
| Liver Disease                          | 151 (1.51)        | 140 (1.69)        | 11 (0.65)        | 0.002   |
| Chronic Pulmonary Disease              | 1464 (14.67)      | 1267 (15.27)      | 197 (11.72)      | <0.001  |
| COPD                                   | 826 (8.28)        | 741 (8.93)        | 85 (5.06)        | <0.001  |
| Pneumonia (Aspiration)                 | 845 (8.47)        | 801 (9.65)        | 44 (2.62)        | <0.001  |
| Pneumonia (Non-Aspiration)             | 1112 (11.14)      | 1027 (12.38)      | 85 (5.06)        | <0.001  |
| <b>Treatment</b>                       |                   |                   |                  |         |
| Antiplatelet agents on discharge       | 5894 (59.06)      | 4845 (58.39)      | 1049 (62.40)     | 0.002   |
| Anticoagulants on discharge            | 1200 (12.03)      | 1051 (12.67)      | 149 (8.86)       | <0.001  |
| Antiplatelet agents on admission       | 3657 (36.65)      | 3078 (37.09)      | 579 (34.44)      | 0.040   |
| Anticoagulant agents on admission      | 120 (1.20)        | 111 (1.34)        | 9 (0.54)         | 0.006   |
| <b>Outcome</b>                         |                   |                   |                  |         |
| Died                                   | 4645 (46.55)      | 4078 (49.14)      | 567 (33.73)      | <0.001  |
| LoS                                    | 8.00 (4.00-17.29) | 9.00 (4.00-20.00) | 5.00 (2.02-9.00) | <0.001  |

Table S3. Predictor Variables for Missing Data Analysis

|                                 |                                         |
|---------------------------------|-----------------------------------------|
| Age                             | Liver disease                           |
| Women                           | Cancer                                  |
| Pulmonary Disease               | Metastatic Cancer                       |
| COPD                            | Peptic Ulcer Disease                    |
| Atrial Fibrillation and Flutter | Transient Ischaemic Attack              |
| Cerebral vascular disease       | Pneumonia (Including aspiration)        |
| Chronic heart disease           | Acute myocardial infarction             |
| Congestive heart failure        | Peripheral vascular disease             |
| Renal Disease                   | Connective tissue disease               |
| Dementia                        | Rheumatoid arthritis                    |
| Diabetes                        | Antiplatelet medication on discharge    |
| Hyperlipidaemia                 | Anticoagulation medication on discharge |
| Hypertension                    | Length of stay                          |

Table S4. Summary table of studies assessing the relationship between serum albumin and poor functional outcome or mortality.

|                                                    | Cou<br>ntry | No. of<br>subjec<br>ts | Particip<br>ants                | Age,<br>years | Men,<br>%     | Follo<br>w-up<br>time        | Albumin<br>compariso<br>n | Study<br>outcome                 | Adjustment                                                                                                                                                                            | Effect<br>Estimate     | Categorical<br>Estimate                                                                             | RO<br>B |
|----------------------------------------------------|-------------|------------------------|---------------------------------|---------------|---------------|------------------------------|---------------------------|----------------------------------|---------------------------------------------------------------------------------------------------------------------------------------------------------------------------------------|------------------------|-----------------------------------------------------------------------------------------------------|---------|
| Garibal<br>la SE et<br>al,<br>1998 <sup>2</sup>    | UK          | 225                    | Acute<br>Ischemi<br>c<br>Stroke | 77.6<br>±9.4  | 96(42.<br>7)  | 3<br>month<br>s              | Per +1 g/L                | Mortality                        | Age, sex, mRS, previous<br>illnesses, drugs, smoking                                                                                                                                  | HR:0.91(0.84<br>-0.99) | -                                                                                                   | High    |
| Dziedzi<br>c T et<br>al,<br>2004 <sup>8</sup>      | Pola<br>nd  | 759                    | Acute<br>Ischemi<br>c<br>Stroke | 68.3<br>±12   | 372(4<br>9.0) | 3<br>month<br>s              | Per +1 g/L                | Poor<br>outcome<br>(mRS 4-<br>6) | Age, sex, atrial fibrillation,<br>ischaemic heart disease,<br>smoking, SSS score on<br>admission, infarct size, TC                                                                    | OR:0.96(0.93<br>-0.99) | QR 1:3<br>OR:1.67(1.13-<br>2.47)<br>QRT 2:3 OR:<br>1.15(1.04-1.29)<br>QR 4:3 OR:<br>0.60(0.40-0.97) | High    |
| Carter <sup>3</sup><br>AM et<br>al, 2007           | UK          | 545                    | Acute<br>Ischemi<br>c<br>Stroke | -             | 274(5<br>0.3) | 7.4<br>years(<br>media<br>n) | >43g/L vs<br><38g/L       | Mortality                        | Age, stroke subtype,<br>previous stroke/TIA, atrial<br>fibrillation, creatinine,<br>haemoglobulin, fibrinogen,<br>FVIII, FXIIIa, beta-TG,<br>vWF, tPA                                 | HR:0.65(0.44<br>-0.96) | -                                                                                                   | High    |
| Idicula<br>TT <sup>4</sup> et<br>al, 2009          | Nor<br>way  | 444                    | Acute<br>Ischemi<br>c<br>Stroke | 70.3<br>±14.4 | 250(5<br>6.3) | 2<br>years                   | Per +1 g/L                | Mortality                        | Age, sex and NIHSS score<br>on admission                                                                                                                                              | OR:0.88(0.83<br>-0.93) | -                                                                                                   | High    |
| Alcazar<br>Lazaro<br>V <sup>5</sup> et<br>al, 2013 | Spai<br>n   | 260                    | Acute<br>Ischemi<br>c<br>Stroke | -             | 127(4<br>8.8) | 5<br>years                   | Per -1 g/L                | Mortality                        | Age, BMI, cardiopathy,<br>atrial fibrillation, urea,<br>calcemia, total proteins,<br>cholesterol, glycaemia,<br>embolic mechanism, coma,<br>DBP, Canadian scale score<br>on admission | OR:2.00(1.12<br>-3)    | -                                                                                                   | High    |

|                                  |       |       |                                                    |              |              |          |                                                                             |                                     |                                                                                                                                                                                                                                                                                                                                                                                                                                        |                                                                                   |                                                                                   |              |
|----------------------------------|-------|-------|----------------------------------------------------|--------------|--------------|----------|-----------------------------------------------------------------------------|-------------------------------------|----------------------------------------------------------------------------------------------------------------------------------------------------------------------------------------------------------------------------------------------------------------------------------------------------------------------------------------------------------------------------------------------------------------------------------------|-----------------------------------------------------------------------------------|-----------------------------------------------------------------------------------|--------------|
| Babu MS <sup>9</sup> et al, 2013 | India | 560   | Acute Ischemic Stroke                              | -            | 401(71.6)    | 3 months | Per -1 g/L                                                                  | Poor outcome (mRS 4-6)              | Age, sex, smoking, diabetes, hypertension, alcoholism, TC, HDL-C, LDL-C and TG                                                                                                                                                                                                                                                                                                                                                         | OR: 1.972(1.103-4.001)                                                            | Q1:3 OR: 2.33(1.13-5.68)<br>Q2:3 OR:1.27(1.05-1.63)<br>Q4:3 OR:0.713(0.50-0.96)   | Some concern |
| Zhou HY <sup>1</sup> et al, 2020 | China | 13618 | Acute Ischemic Stroke or transient ischemic attack | 62.17 ±11.26 | 9276 (68.12) | 1 year   | Q1:3 [<35 vs 40-44.9]<br>Q2:3 [35-39.9 vs 40-44.9]<br>Q4:3 [>45 vs 40-44.9] | Poor outcome                        | Age, sex, BMI, medical history (hypertension, diabetes mellitus, stroke or TIA, coronary heart disease and atrial fibrillation/flutter), diagnosis type, TOAST type, NIHSS score on admission, Pre-stroke mRS 0-2 on admission, intracranial arterial stenosis, extracranial arterial stenosis, intravenous thrombolysis, inpatient medication (antihypertensive agents, anticoagulation agents), TG, TC, LDL, HDL, ALT, eGFR, hs-CRP) | Q1:3 OR:1.37(1.12-1.67)<br>Q2:3 0.99(0.88-1.13)<br>Q3:4 0.95(0.79-1.16)           | Q1:3 OR:1.37(1.12-1.67)<br>Q2:3 0.99(0.88-1.13)<br>Q3:4 0.95(0.79-1.16)           | Some concern |
|                                  |       |       |                                                    |              |              |          |                                                                             | Mortality                           |                                                                                                                                                                                                                                                                                                                                                                                                                                        | Q1:3 HR:1.93(1.45 to 2.57)<br>Q2:3 HR:1.12 (0.89-1.41)<br>Q3:4 HR:1.14(1.03-1.26) | Q1:3 HR:1.93(1.45 to 2.57)<br>Q2:3 HR:1.12 (0.89-1.41)<br>Q3:4 HR:1.14(1.03-1.26) | Some concern |
| Yang et al <sup>7</sup> , 2021   | China | 142   | Acute Ischemic Stroke with EVT                     | -            | 196(63.01)   | 3 months | Q1 [<39.93]<br>Q2 [39.3-42.0]<br>Q3 [42.1-43.5]                             | Poor functional outcome (mRS = 3-6) | Age, sex, current smoking, and NIHSS at admission)                                                                                                                                                                                                                                                                                                                                                                                     | Q2:1 OR: 0.541(0.137-2.136)<br>Q3:1 OR: 0.609(0.148-2.509)                        | Q1 OR: -<br>Q2 OR: 0.541(0.137-2.136)                                             | High         |

|                              |    |      |                              |                 |                 |                     |                                                                                          |                 |                                                                                                                                                                                                                                                                                                                                                                                                                                                                                                                                                                       |                                                                                                       |                                                                                              |                         |
|------------------------------|----|------|------------------------------|-----------------|-----------------|---------------------|------------------------------------------------------------------------------------------|-----------------|-----------------------------------------------------------------------------------------------------------------------------------------------------------------------------------------------------------------------------------------------------------------------------------------------------------------------------------------------------------------------------------------------------------------------------------------------------------------------------------------------------------------------------------------------------------------------|-------------------------------------------------------------------------------------------------------|----------------------------------------------------------------------------------------------|-------------------------|
|                              |    |      |                              |                 |                 |                     | Q4<br>[>43.5]                                                                            |                 |                                                                                                                                                                                                                                                                                                                                                                                                                                                                                                                                                                       | Q4:1 OR:<br>0.702(0.194-<br>2.534)                                                                    | Q3 OR:<br>0.609(0.148-<br>2.509)<br>Q4 OR:<br>0.702(0.194-<br>2.534)                         |                         |
| Thuem<br>mler et<br>al, 2023 | UK | 9979 | Acute<br>Ischemi<br>c stroke | 78.26<br>±11.23 | 4290(<br>43.38) | In-<br>hospit<br>al | Q1:3 [<35<br>vs 40-44]<br>Q2:3 [35-<br>39.9 vs<br>40-44]<br>Q4:3[42-<br>47 vs 40-<br>44] | Poor<br>outcome | Age sex, OSCP, Pre-stroke<br>(mRS 0-2) on admission,<br>NIHSS score on admission,<br>medical history<br>(hypertension, diabetes,<br>coronary heart disease, atrial<br>fibrillation, chronic kidney<br>disease, peripheral vascular<br>disease, hyperlipidaemia,<br>liver disease, chronic<br>pulmonary disease, COPD,<br>chronic heart failure, peptic<br>ulcer disease,<br>cerebrovascular disease,<br>cancer, dementia,<br>connective tissue disease)<br>inpatient medication<br>(antiplatelets at discharge,<br>anti-coagulation therapy at<br>discharge) CRP, WBC | Q1:3 RR:<br>1.51(1.29-<br>1.76)<br>Q1:3 RR:<br>1.18(1.02-<br>1.37)<br>Q4:3 RR:<br>1.18(1.02-<br>1.37) | Q1:3 RR:<br>1.51(1.29-1.76)<br>Q1:3 RR:<br>1.18(1.02-1.37)<br>Q4:3 RR:<br>1.18(1.02-1.37)    | Som<br>e<br>conc<br>ern |
|                              |    |      |                              |                 |                 | 5.5<br>years        |                                                                                          | Mortality       |                                                                                                                                                                                                                                                                                                                                                                                                                                                                                                                                                                       | QR1<br>HR:1.35(1.22<br>-1.49)<br>QR2 HR:<br>1.10(1.00-<br>1.21)<br>QR3<br>HR:1.14(1.03<br>-1.26)      | QR1<br>HR:1.35(1.22-<br>1.49)<br>QR2 HR:<br>1.10(1.00-1.21)<br>QR3<br>HR:1.14(1.03-<br>1.26) | Som<br>e<br>conc<br>ern |

BMI, body mass index; TOAST, the Trial of Org 10172 in Acute Stroke Treatment; NIHSS, National Institute of Health Stroke Scale; mRS, modified

Rankin Score; OSCP, Oxford Community Stroke Project; ROB, Risk of Bias; TC, total cholesterol; HDL, high-density lipoprotein, low-density

lipoprotein; TG, triglyceride; eGFR, estimated glomerular filtration rate; ALT, alanine aminotransferase; hs-CRP, high-sensitivity C-reactive protein; DBP, diastolic blood pressure; vWF, von Willebrand factor; tPA, tissue-type plasminogen activator; OR, odds ratio; HR, hazard ratio

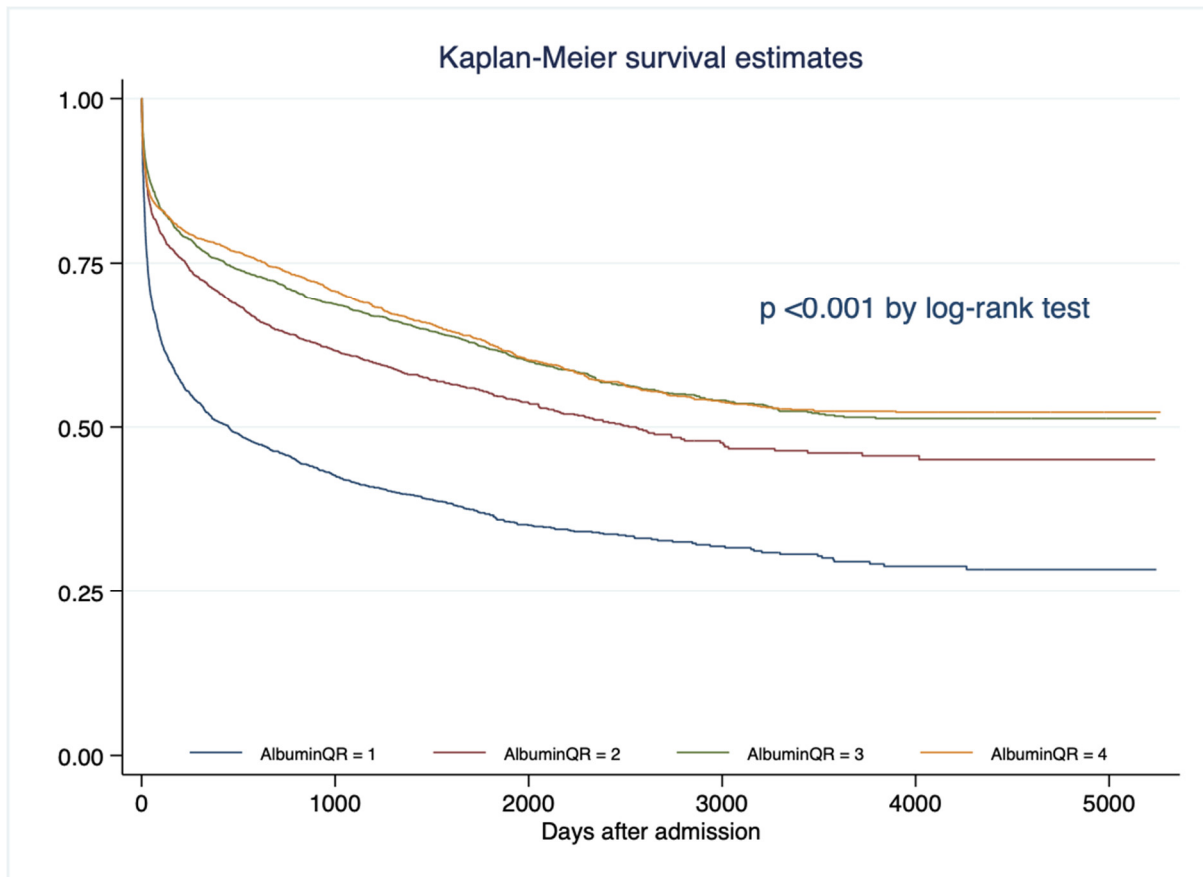

Figure S1. Kaplan-Meier survival analysis of patients with AIS, categorized into four quartiles based on their albumin levels: QR1 (<35), QR2 (35-37), QR3 (38-41) and QR4 (>41). Patients with low albumin levels were more likely to be dead at long-term follow up ( $p < 0.001$  by log-rank test).



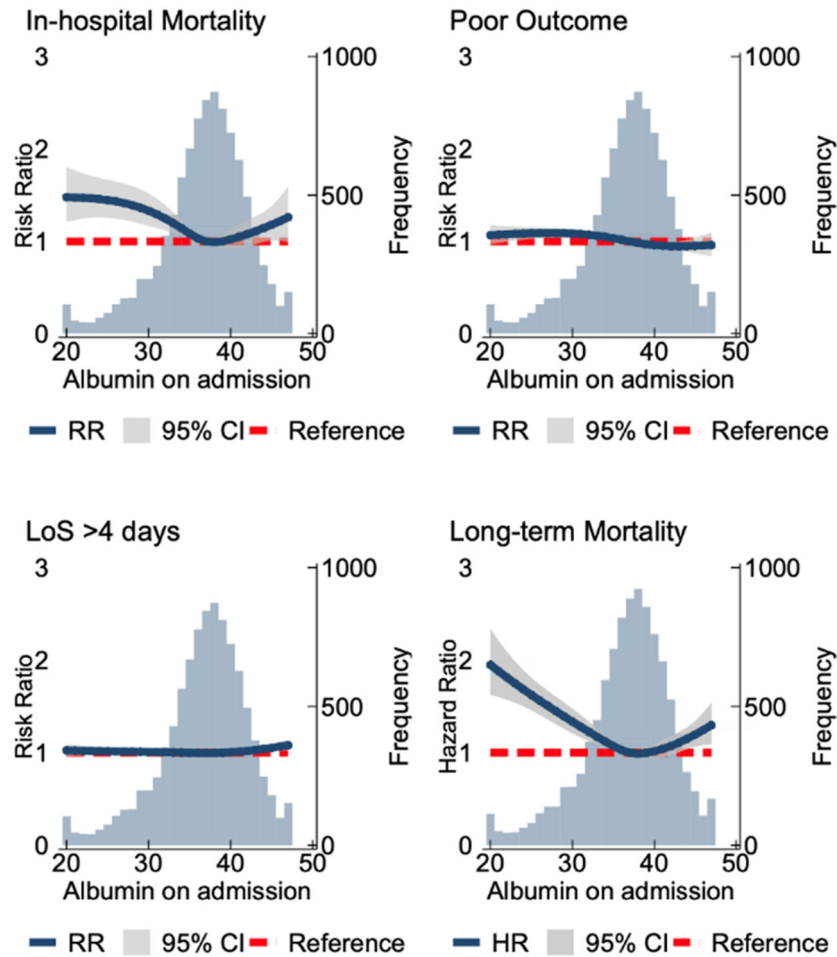

Figure S2. Spline models assessing the association between serum albumin and clinical outcomes without National Institute of Health Stroke Scale adjustment. The association with serum albumin level and in-hospital mortality, poor functional outcomes (modified Rankin Scale(mRS) score of 3-6) and increased length of stay (>4days). The association of serum albumin and long-term mortality at 5.5 year follow up. The blue line indicates the RR/HR, and the grey area indicates the confidence interval. The red line demonstrates the null effect line. The long-term mortality models were fitted by a Cox regression with adjustments made for age, sex comorbidities(chronic pulmonary disease, atrial fibrillation, cerebrovascular disease, congestive heart disease, heart failure, renal disease, chronic obstructive pulmonary

disease, dementia, diabetes, hypertension, hyperlipidaemia, liver disease, cancer, peptic ulcer disease, peripheral disease and connective tissue disease, pneumonia (aspiration and non-aspiration), anti-platelet and anti-coagulation medication on discharge/admission, OSCP scale, pre-stroke mRS score, serum white blood count, C-reactive protein.

### Poor Outcome

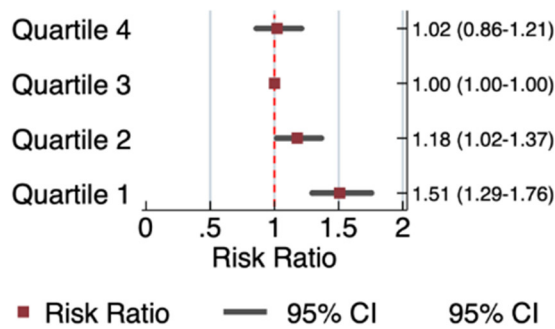

### In-hospital Mortality

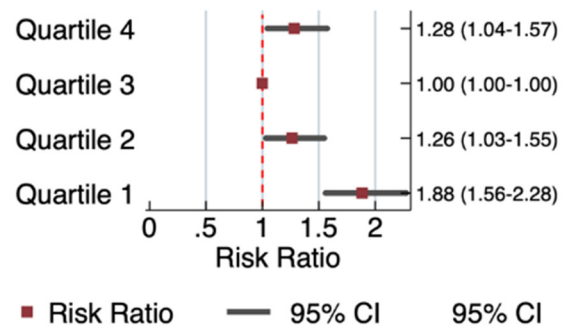

### LoS >4 days

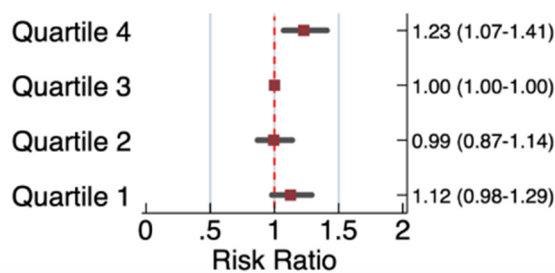

### Long term mortality

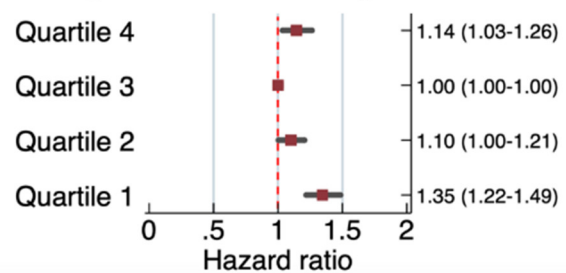

Figure S3. Forest plots assessing the association between serum albumin and clinical outcomes. The association with serum albumin level and in-hospital mortality, poor functional outcomes (modified Rankin Scale(mRS) score of 3-6) and increased length of stay (>4days). The association of serum albumin and long-term mortality at 5.5 year follow up. The blue line indicates the RR/HR, and the grey area indicates the confidence interval. The red line demonstrates the null effect line. The long-term mortality models were fitted by a Cox regression with adjustments made for age, sex comorbidities(chronic pulmonary disease, atrial fibrillation, cerebrovascular disease, congestive heart disease, heart failure, renal disease, COPD, dementia, diabetes, hypertension, hyperlipidaemia, liver disease, cancer, peptic ulcer disease, peripheral disease and connective tissue disease, pneumonia (aspiration and non-aspiration), anti-platelet and anti-coagulation medication on discharge/admission, National Institute of Health Stroke Scale, OSCP scale, pre-stroke mRS score, serum white blood count and C-reactive protein.

### Poor Outcome

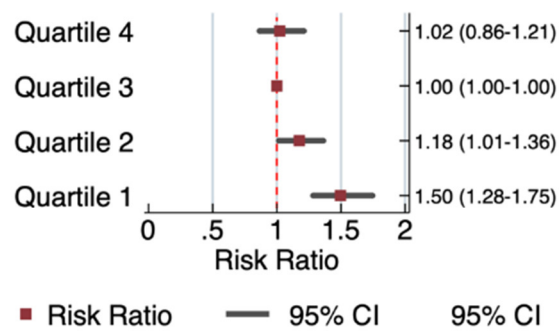

### In-hospital Mortality

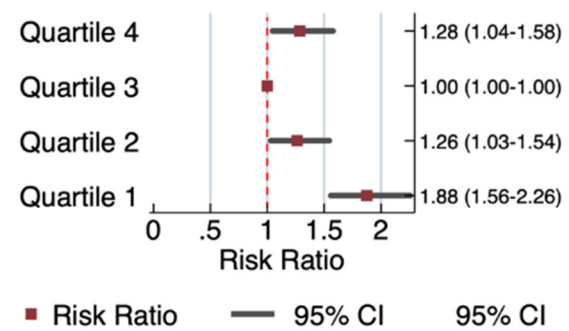

### LoS >4 days

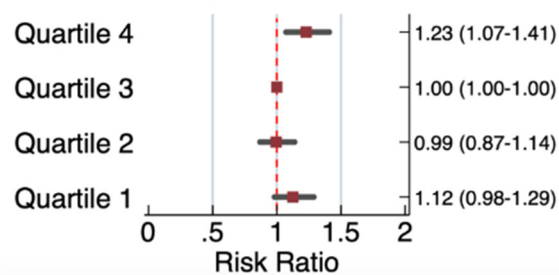

### Long term mortality

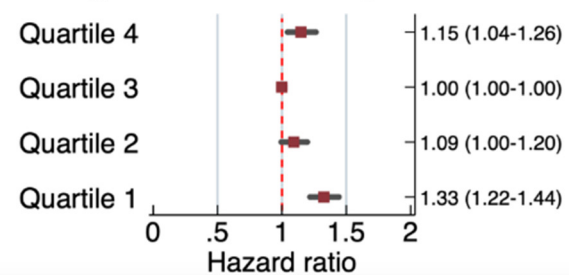

Figure S4. Forest plot assessing the association between serum albumin and clinical outcomes without National Institute of Health Stroke Scale adjustment. The association with serum albumin level and in-hospital mortality, poor functional outcomes (modified Rankin Scale (mRS) score of 3-6) and increased length of stay (>4days). The association of serum albumin and long-term mortality at 5.5 year follow up. The blue line indicates the RR/HR, and the grey area indicates the confidence interval. The red line demonstrates the null effect line. The long-term mortality models were fitted by a Cox regression with adjustments made for age, sex comorbidities (chronic pulmonary disease, atrial fibrillation, cerebrovascular disease, congestive heart disease, heart failure, renal disease, COPD, dementia, diabetes, hypertension, hyperlipidaemia, liver disease, cancer, peptic ulcer disease, peripheral disease and connective tissue disease, pneumonia (aspiration and non-aspiration), anti-platelet and anti-coagulation medication on discharge/admission, OSCP scale, pre-stroke mRS score, serum white blood count, C-reactive protein.

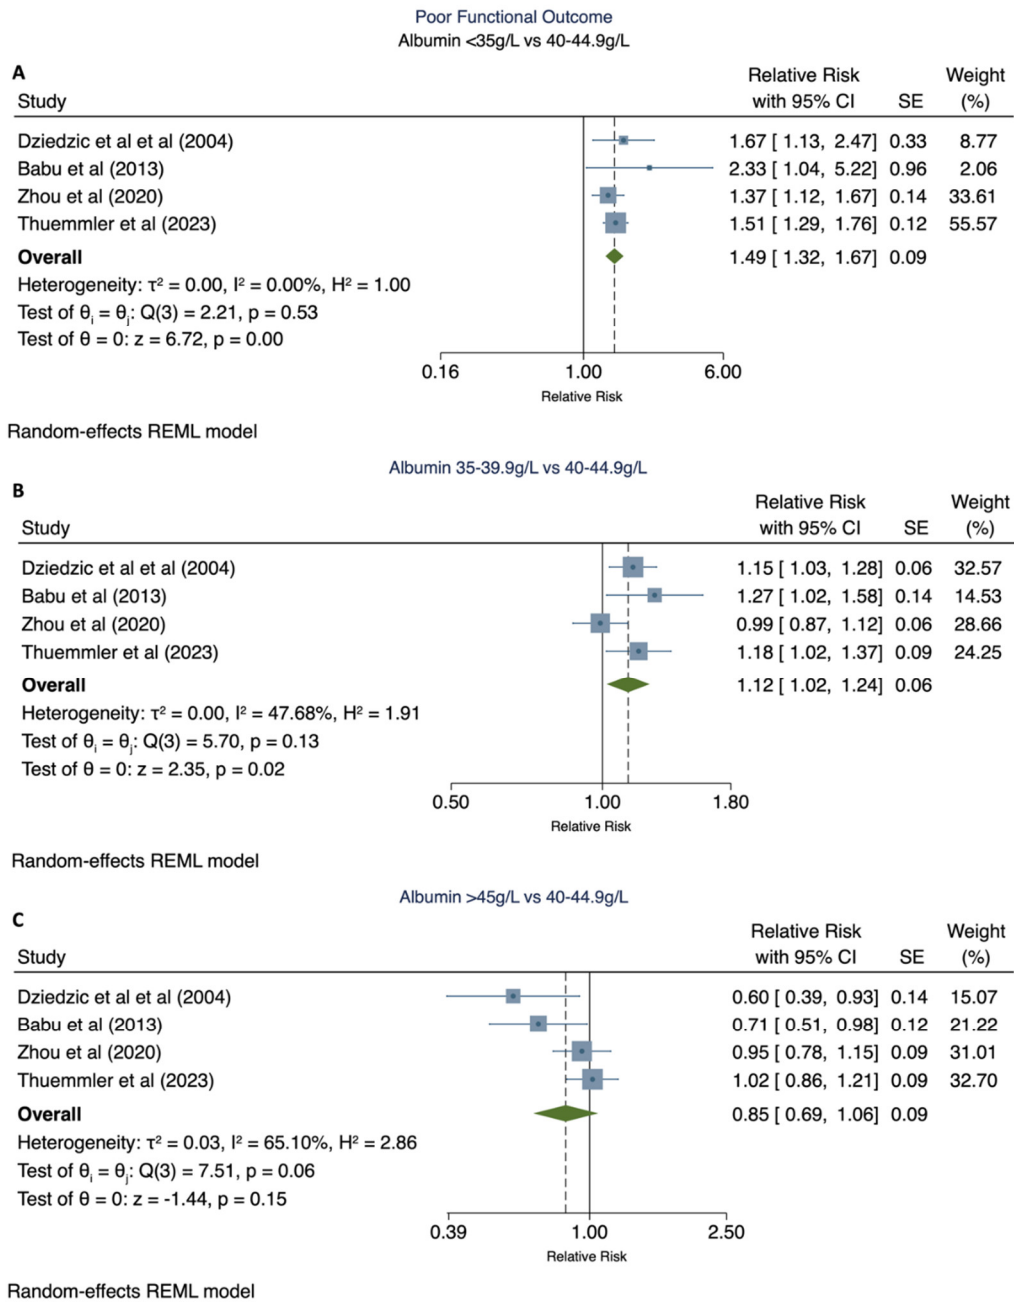

Figure S5. Meta-analysis of the association of categorical serum albumin levels with poor functional outcomes. (A) demonstrates the pooled relative risk of poor functional outcomes for serum albumin levels <35 g/L vs. 40-44 g/L. (B) demonstrates the pooled relative risk of serum albumin levels 35-39.9 g/L vs. 40-44 g/L. (C) demonstrates the relative risk of serum albumin levels >45 g/L vs. 40-44 g/L. CI, confidence interval; SE, standard error; P, *p*-value.

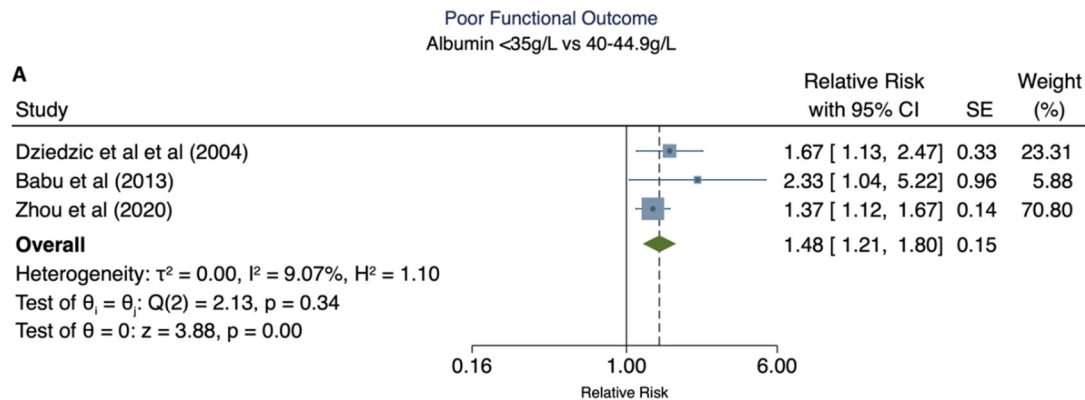

Random-effects REML model

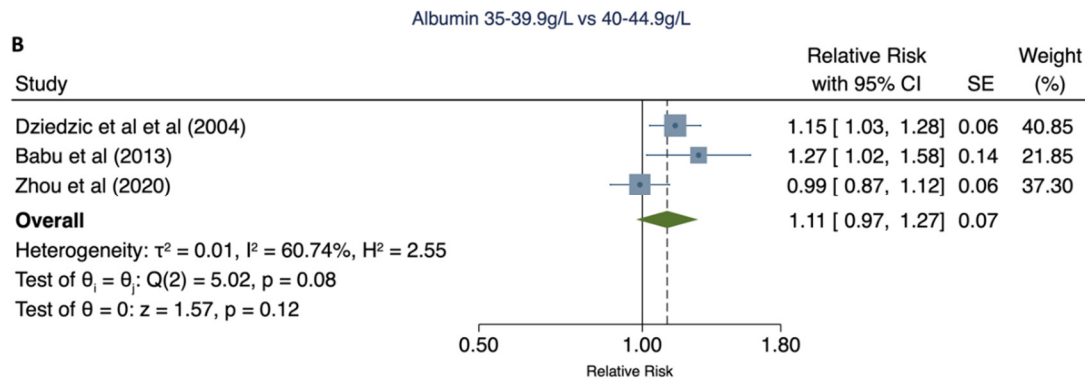

Random-effects REML model

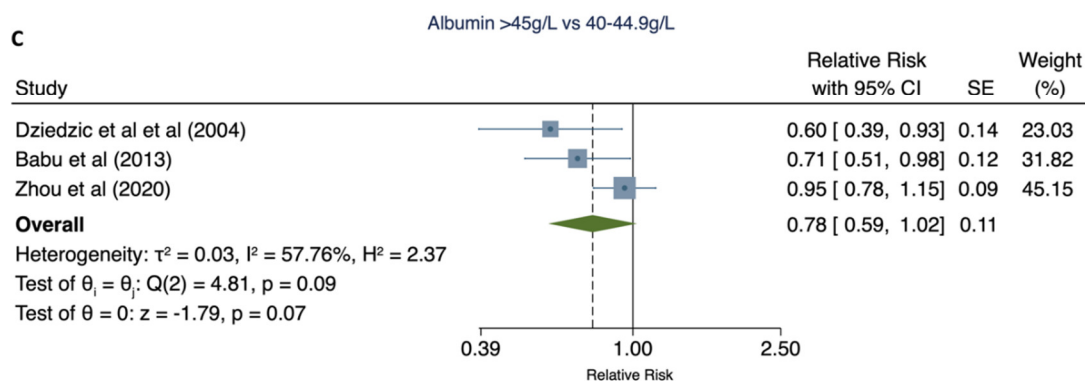

Random-effects REML model

Figure S6. Sensitivity analyses of poor functional outcomes by omitting Thuemmler *et al.*, due variation in follow up. (A) demonstrates the pooled relative risk of poor functional outcomes for serum albumin levels <35 g/L vs. 40-44 g/L. (B) demonstrates the pooled relative risk of serum albumin levels 35–39.9 g/L vs. 40-44 g/L. (C) demonstrates serum albumin levels >45 g/L vs. 40-44 g/L. CI, confidence interval; SE, standard error; P, *p*-value.

|                                                                              |                       | Risk of bias domains |    |    |    |    |    |    |         |
|------------------------------------------------------------------------------|-----------------------|----------------------|----|----|----|----|----|----|---------|
|                                                                              |                       | D1                   | D2 | D3 | D4 | D5 | D6 | D7 | Overall |
| Study                                                                        | Dziedzic et al, 2004  |                      |    |    |    |    |    |    |         |
|                                                                              | Babu et al, 2013      |                      |    |    |    |    |    |    |         |
|                                                                              | Zhou et al, 2020      |                      |    |    |    |    |    |    |         |
|                                                                              | Yang et al, 2022      |                      |    |    |    |    |    |    |         |
|                                                                              | Thuemmler et al, 2023 |                      |    |    |    |    |    |    |         |
| Domains:                                                                     |                       | Judgement            |    |    |    |    |    |    |         |
| D1: Bias due to confounding.                                                 |                       | High                 |    |    |    |    |    |    |         |
| D2: Bias arising from measurement of the exposure.                           |                       | Some concerns        |    |    |    |    |    |    |         |
| D3: Bias in selection of participants into the study (or into the analysis). |                       | Low                  |    |    |    |    |    |    |         |
| D4: Bias due to post-exposure interventions.                                 |                       |                      |    |    |    |    |    |    |         |
| D5: Bias due to missing data.                                                |                       |                      |    |    |    |    |    |    |         |
| D6: Bias arising from measurement of the outcome.                            |                       |                      |    |    |    |    |    |    |         |
| D7: Bias in selection of the reported result.                                |                       |                      |    |    |    |    |    |    |         |

Figure S7. Risk of bias assessment of papers assessing albumin levels and poor functional outcome

## Supplemental References

1. Zhou H, Wang A, Meng X, et al. Low serum albumin levels predict poor outcome in patients with acute ischaemic stroke or transient ischaemic attack. *Stroke Vasc Neurol* 2021; 6: 458–466.
2. Gariballa SE, Parker SG, Taub N, et al. Influence of nutritional status on clinical outcome after acute stroke. *Am J Clin Nutr* 1998; 68: 275–281.
3. Carter AM, Catto AJ, Mansfield MW, et al. Predictive Variables for Mortality After Acute Ischemic Stroke. Epub ahead of print 2007. DOI: 10.1161/STROKEAHA.106.474569.
4. Idicula TT, Waje-Andreassen U, Brogger J, et al. Serum Albumin in Ischemic Stroke Patients: The Higher the Better The Bergen Stroke Study. *Cerebrovascular Diseases* 2009; 28: 13–17.
5. Lázaro VA, Del Ser Quijano T, Martín RB. Hypoalbuminemia and other prognostic factors of mortality at different time points after ischemic stroke. *Nutr Hosp* 2013; 28: 456–463.
6. Chapter 10: Analysing data and undertaking meta-analyses | Cochrane Training, <https://training.cochrane.org/handbook/current/chapter-10> (accessed 3 September 2023).
7. Yang D, Shen J, Huang H, et al. Elevated Albumin to Globulin Ratio on Day 7 is Associated with Improved Function Outcomes in Acute Ischemic Stroke Patients with Intravenous Thrombolysis. Epub ahead of print 2022. DOI: 10.2147/JIR.S347026.
8. Dziedzic T, Slowik A, Szczudlik A. Serum Albumin Level as a Predictor of Ischemic Stroke Outcome. *Stroke*; 35. Epub ahead of print 1 June 2004. DOI: 10.1161/01.STR.0000126609.18735.BE.
9. Babu MS, Kaul S, Dadheech S, et al. Serum albumin levels in ischemic stroke and its subtypes: correlation with clinical outcome. *Nutrition* 2013; 29: 872–875.
